1       **Development of a SYBR Green quantitative PCR assay for detection of**  
2                    *Lates calcarifer herpesvirus (LCHV) in farmed barramundi*

3       Watcharachai Meemetta<sup>1</sup>, Jose A. Domingos<sup>2</sup>, Ha Thanh Dong<sup>3\*</sup>, Saengchan Senapin<sup>1,4\*</sup>

4

5       <sup>1</sup>Fish Health Platform, Center of Excellence for Shrimp Molecular Biology and  
6       Biotechnology (Centex Shrimp), Faculty of Science, Mahidol University, Bangkok, Thailand,  
7       10400

8       <sup>2</sup>Tropical Futures Institute, James Cook University, Singapore, 387380

9       <sup>3</sup>Faculty of Science and Technology, Suan Sunandha Rajabhat University, Bangkok,  
10       Thailand, 10300

11       <sup>4</sup>National Center for Genetic Engineering and Biotechnology (BIOTEC), National Science  
12       and Technology Development Agency (NSTDA), Pathum Thani, Thailand, 12120

13

14       **Running head:** qPCR detection of LCHV

15

16       \*Corresponding authors:

17       H.T. Dong (hathanh.do@ssru.ac.th)

18       S. Senapin (saengchan@biotec.or.th)

19 **Highlights**

- 20 • This study reported a new SYBR Green qPCR method for detection of LCHV
- 21 • The qPCR method had detection limit of 10 copies per  $\mu$ l plasmid DNA template when
- 22 spiked with genomic DNA from the host
- 23 • The aforementioned method is highly specific to LCHV
- 24 • Validation with clinical samples revealed that LCHV could be detected from multiple
- 25 organs with fin and brain the best organs for qPCR detection

26 **ABSTRACT**

27 *Lates calcarifer* herpes virus (LCHV) is a new virus of farmed barramundi in Southeast Asia.  
28 However, a rapid detection method is yet to be available for LCHV. This study, therefore,  
29 aimed to develop a rapid quantitative PCR (qPCR) detection method for LCHV and made it  
30 timely available to public for disease diagnostics and surveillance in barramundi farming  
31 countries. A newly designed primer set targeting a 93-bp fragment of the LCHV putative  
32 major envelope protein encoding gene (*MEP*) was used for developing and optimizing a  
33 SYBR Green based qPCR assay. The established protocol could detect as low as 10 viral  
34 copies per  $\mu$ l of DNA template in a reaction containing spiked host DNA. No cross-  
35 amplification with genomic DNA extracted from host as well as common aquatic pathogens  
36 (12 bacteria and 3 viruses) were observed. Validation test of the method with clinical samples  
37 revealed that the virus was detected in multiple organs of the clinically sick fish but not in the  
38 healthy fish. We thus recommend that barramundi farming countries should promptly initiate  
39 active surveillance for LCHV in order to understand their circulation for preventing possibly  
40 negative impact to the industry.

41 **Keywords:** detection, *Lates calcarifer* herpes virus (LCHV), qPCR

## 42 INTRODUCTION

43 Barramundi (*Lates calcarifer*) or Asian sea bass is one of the economically important finfish  
44 species in Asia-Pacific which has been farmed in a wide range of salinity in either open cage  
45 systems or earthen ponds (Jerry et al., 2014). Barramundi, like other intensively farmed fish,  
46 is susceptible to various infectious pathogens and often subject to serious outbreaks and  
47 economic losses (Dong et al., 2017a, b; Jerry et al., 2014; Ransangan et al., 2010; Toranzo et  
48 al., 2005). In recent years, three newly emerging viruses have been reported in farmed  
49 barramundi in Asia-Pacific, including scale drop disease virus (SDDV) (Gibson-Kueh et al.,  
50 2012; de Groof et al., 2015), *Lates calcarifer* herpes virus (LCHV) (Chang et al., 2017) and  
51 *Lates calcarifer* birnavirus (LCBV) (Chen et al., 2019). Both SDDV and LCHV were  
52 discovered from disease outbreaks where the fish showed clinical symptoms of “scale drop”  
53 and laboratory infections with the cultivated virus from cell culture resulted in up to 60% and  
54 77% cumulative mortality, respectively (de Groof et al., 2015; Chang et al., 2017). By  
55 contrast, LCBV did not induce mortality in the controlled laboratory trial (Chen et al., 2019).

56 LCHV discovered by Chang et al. (2017) is a novel member of the family *Alloherpesviridae*,  
57 which is genetically most similar to *Ictalurid herpesvirus 1* (<60% nucleotide identity), a  
58 pathogenic virus of channel catfish. LCHV is an enveloped virus with diameter of  
59 approximately 100 nm, and genome size of ~130 kb while other members of  
60 *Alloherpesviridae* are between 150-250 nm in diameter and 100-250 kb in genome size  
61 (Hanson et al., 2011; Chang et al., 2017).

62 Both SDDV and LCHV infections cause similar scale drop disease-like gross signs which are  
63 clinically indistinguishable. Therefore, molecular detection methods are required for diagnostic  
64 and screening purposes. Several DNA-based detection methods for SDDV have been freely  
65 available such as single PCR (Senapin et al., 2019), semi-nested PCR (Charoenwai et al.,

66 2019), loop-mediated isothermal amplification (LAMP) (Dangtip et al., 2019), probe-based  
67 qPCR (de Groof et al., 2015), and SYBR Green-based qPCR (Sriisan et al., 2020). The latter  
68 one is the most sensitive method with a detection limit of 2 copies of DNA template per  
69 reaction. In case of LCHV, following discovery of the virus, several primer sets for detection  
70 purpose were published in a patent (Chang et al., 2017), the use of these methods thus might  
71 be conditionally limited. According to requests from private sector, this study, therefore,  
72 developed a new, sensitive qPCR detection method for rapid diagnostics of LCHV and made  
73 it available to promote active surveillance for preventing wide-spread of this pathogen.

74

## 75 **MATERIALS AND METHODS**

### 76 **Fish samples and DNA extraction**

77 In 2019, there were 3 batches of barramundi samples subjected to testing for LCHV in our  
78 laboratory. Batch 1 comprised of adult fish (n = 5) in which 4 of them exhibited scale drop  
79 clinical signs while one fish had healthy looking appearance. Eight different tissue types  
80 (liver, kidney, spleen, gills, fin, brain, eyes and muscle) from each fish were dissected and  
81 individually preserved in 95% ethanol. Batch 2 comprised of apparently healthy barramundi  
82 fry that were ethanol-preserved. Three whole fry were pooled and considered as one sample  
83 for the test (n = 5 pools). Batch 3 (n = 10) comprised of ethanol-preserved spleen samples  
84 collected from 5 apparently healthy juvenile fish and 5 clinically sick fish showing scale drop  
85 disease-like symptoms. Approximately 5 mg tissue was subjected to DNA extraction using  
86 conventional sodium dodecyl sulfate/proteinase K containing lysis solution followed by  
87 phenol/chloroform extraction and ethanol precipitation. The obtained DNA pellet was  
88 resuspended in sterile distilled water and quantified using spectrophotometry at OD 260 and  
89 280 nm.

## 90 **Primer design and PCR conditions**

91 LCHV primers were designed to target a 93 bp partial fragment of a putative major envelop  
92 protein (*MEP*) gene of the virus. Forward primer LCHV-MEP93-qF: 5'-  
93 GTACTTCATCGCCTACGGAGC-3' and reverse primer LCHV-MEP93-qR: 5'-  
94 TACGTGTGCTTGAGGAGGTC-3' were synthesized from Bio Basic, Canada. Gradient  
95 PCR was firstly conducted to find an optimal annealing temperature ( $T_a$ ) using  $T_a$  ranging  
96 from 58 to 65 °C. The reaction mixture of 20  $\mu$ L contained 200 ng of DNA extracted from fin  
97 of LCHV-infected fish, 1x iTaq Universal SYBR Green SuperMix (Bio-Rad Cat.no. 172-  
98 5121) and 200 nM of each primer. The PCR amplification conditions were initial  
99 denaturation at 95°C for 10 min followed by 40 cycles of 95°C for 10 s and annealing at 58-  
100 65 °C for 30 s (Bio-Rad CFX Connect Real-Time PCR) followed by melt peak analysis.  
101 Finally,  $T_a$  of 61°C was selected and the same thermocycling conditions were used  
102 throughout the study.

## 103 **Sensitivity, qPCR efficiency, and specificity assays**

104 Positive control plasmid namely pMEP93 was constructed for use in diagnostic sensitivity  
105 test. This was done by cloning the 93-bp *MEP* amplified fragment obtained above into pGEM  
106 T-easy vector (Promega) and transforming into *Escherichia coli* XL-1 blue. After colony  
107 PCR verification of potential correct clones, one recombinant clone was sent for DNA  
108 sequencing at Macrogen (South Korea). Copy number of pMEP93 was calculated based on  
109 plasmid size and concentration at <https://cels.uri.edu/gsc/cndna.html> and the pMEP93 was 10  
110 fold-serially diluted from  $10^7$  to 1 copies/ $\mu$ l. Plasmid dilutions (2  $\mu$ l) were then used as  
111 template in qPCR conditions described above. To mimic a real test, each reaction also  
112 contained spiked 100 ng DNA extracted from a healthy barramundi. Control reaction without  
113 pMEP93 was used as a negative control. Analytical sensitivity experiment was conducted in

114 3 replicates within the same run. Standard curve was then automatically generated from  
115 quantification cycle (Cq) values being plotted versus  $\log_{10}$  pMEP93 quantity. Formula for  
116 copy number calculation, coefficient of correlation ( $R^2$ ), and amplification efficiency (E)  
117 values were also provided by the Bio-Rad Maestro Software.

118 The optimized qPCR protocol was subsequently used to test for specificity against extracted  
119 genomic DNA from i) clinically healthy fish, ii) from 12 common aquatic bacterial species,  
120 and iii) from fish samples infected with either infectious spleen and kidney necrosis virus  
121 (ISKNV), nervous necrosis virus (NNV), or scale drop disease virus (SDDV). Sample  
122 sources and preparation were previously described (Charoenwai et al., 2019; Sriisan et al.,  
123 2020). DNA extracted from fin of LCHV-infected fish was used as positive control. No  
124 template control was used as negative reaction. Specificity test was performed in 2 replicates  
125 by 2 qPCR runs.

#### 126 **LCHV detection in field samples**

127 The newly developed qPCR was used to detect and quantify LCHV loads in the barramundi  
128 DNA samples prepared from 3 fish batches. 200 ng DNA template was used in each qPCR  
129 reaction. The obtained Cq was used to calculate viral copy numbers in the samples using the  
130 equation, copy number =  $10^{(Cq - \text{Intercept})/\text{Slope}}$  i.e.  $10^{(Cq - 41.34)/-3.539}$  derived from the stand curve  
131 described above. Comparative evaluation of the viral loads in different fish tissue types was  
132 performed using samples from batch 1.

133

## 134 **RESULTS**

### 135 **SYBR Green based LCHV qPCR**

136 The LCHV qPCR protocol developed in this study had a detection limit of 10 copies/ $\mu$ l  
137 template i.e. 20 copies/reaction. Mean  $C_q \pm SD$  values of the detection limit were  $37.91 \pm$   
138  $0.33$  (**Fig. 1a**). In other words, samples with  $C_q \leq 37.91 \pm 0.33$  were considered as LCHV  
139 positive tests. The amplified products yielded uniform melting temperatures ( $T_m$ ) at  $84.0^\circ\text{C}$   
140 (**Fig. 1b**), indicating that the primers and the condition assayed were specific. The 93-bp  
141 amplicon had a relatively high  $T_m$  due to its 58% GC content of the sequence. Note that there  
142 was 1 nucleotide difference (**Supplemental Fig. 1**) between the target sequence in this study  
143 and that from the previous data (Chang et al., 2017). Based on the standard curve shown in  
144 **Fig. 1c**, the performance of the newly developed qPCR was high determined by its  
145 amplification efficiency (E) of 91.7% with  $R^2$  of 0.995. When evaluated the protocol  
146 specificity, the LCHV qPCR was demonstrated to be highly specific because it only detected  
147 LCHV infected sample but not DNA extracted from 3 other viruses, 12 bacteria, or clinically  
148 healthy fish tested. Data from one of the two replicates is shown in **Fig. 2**.

#### 149 **LCHV detection in fish samples**

150 Tissue tropism of LCHV was revealed using the sample batch 1. Among all 8 tissues (liver,  
151 kidney, spleen, gills, fin, brain, eyes and muscle) tested from 4 diseased barramundi, the  
152 qPCR assay detected LCHV DNA at variable loads in 3-7 tissue types of each fish but not in  
153 the kidney samples (**Table 1**). There was only 1 in 4 liver sample which tested positive for  
154 LCHV with low viral loads (32 copies/200 ng DNA). DNA extracted from the fin, gills and  
155 muscle had averagely higher LCHV loads (24-597 copies/200 ng DNA) when compared to  
156 that of the brain, eyes, spleen and liver (13.7-184 copies/200 ng DNA). LCHV was not  
157 detected in any of the 8 tissue types of a clinically healthy fish from the same batch (**Table**  
158 **1**).



159 The established qPCR was also applied to diagnose field samples from batches 2 and 3. DNA  
160 from all five pools of clinically healthy fry from batch 2 tested negative for by LCHV (**Table**  
161 **2**). In batch 3, LCHV was detected from 5 clinically sick fish with viral loads ranging from  
162 18.7 to 115.9 copies per 200 ng DNA (C<sub>q</sub> 36.84-34.04) and undetectable in 5 clinically  
163 healthy fish (**Table 2**).

## 164 **DISCUSSION**

165 LCHV and SDDV infections reportedly cause similar gross sign of “scale drop” in infected  
166 barramundi (de Groof et al., 2015; Chang et al., 2017). Despite the fact that both SDDV and  
167 LCHV have been recently discovered, the “scale drop” syndrome has been recognized in  
168 Southeast Asia since 1992 (Gibson-Kueh et al., 2012; de Groof et al., 2015). Therefore, it  
169 has raised a concern that both of these pathogens may have been long undiagnosed in farmed  
170 barramundi due to unavailability of respective diagnostic tools at that time. Nevertheless,  
171 currently several molecular detection methods for SDDV are available to support disease  
172 investigation. However, following discovery of LCHV as an emerging virus in Singapore in  
173 2017 (Chang et al., 2017), there was no continuous research up-to-date. Although several sets  
174 of primers were described in the original patent document by Chang et al. (2017), their  
175 detection limits and test specificity remain uninvestigated. The validated qPCR method  
176 developed in this study might serve as a useful diagnostic tool for rapid screening of the  
177 suspected cases as well as active surveillance and early monitoring of the pathogen for the  
178 barramundi aquaculture industry.

179 Detection of LCHV in multiple organs of the clinically sick fish suggests that the virus  
180 caused systemic infection, similar to that of SDDV (Senapin et al., 2019; Charoenwai et al.,  
181 2019; Sriisan et al., 2020). Interestingly, the liver and kidney tissues which are normally used  
182 for PCR diagnostics of fish viruses appeared to be unsuitable for LCHV detection while the

183 fin seemed to be the best targeted tissue due to its highest viral loads, followed by gills,  
184 muscle, spleen and brain. There was a limitation of fish numbers in this study, further  
185 comparative analysis should be done with larger sample numbers in order to gain a better  
186 understanding of virus tissue tropism as well as viral loads in the fish at different stages of  
187 infection. Nevertheless, this knowledge might be useful for establishment of cost-effective  
188 and non-destructive sampling strategies of fin and/or gills of farmed fish for periodical  
189 monitoring of the LCHV.

190 The present study focused primarily on the development and validation of a sensitive qPCR  
191 detection method for LCHV. Apart from LCHV, several pathogens have been reported to  
192 cause similar clinical signs of “scale drop” including SDDV (Gibson-Kueh et al., 2012; de  
193 Groof et al., 2015; Senapin et al., 2019), a pathogenic strain of *Vibrio harveyi*, and  
194 *Tenacibaculum maritimum* (Dong et al., 2017a; Gibson-Kueh et al., 2012). Relatively low  
195 viral loads present in the clinically sick fish with scale drop disease-like symptoms suggests  
196 that LCHV might be an opportunistic pathogen rather than the true causative agent of the  
197 diseased fish investigated in this study. However, identification of other pathogens in field  
198 samples was not done in this study. We thus recommend that investigation of the at least four  
199 aforementioned agents should be considered for the fish showing scale drop symptoms in  
200 order to weigh involvement of each pathogen in field outbreaks.

201

## 202 **Acknowledgements**

203 This study was supported by a research grant from Mahidol University.

204

## 205 **Conflict of interest**

206 The authors declare no conflict of interest.

207 **References**

- 208 Chang SF, Ng KS, Grisez L, De Groof A, Vogels W, Van Der Hoek L, Deijs M. 2017. Novel  
209 fish pathogenic virus. International patent no. WO 2018/029301 A1. USA: World  
210 Intellectual Property Organization.
- 211 Charoenwai, O., Meemetta W., Sonthi, M., Dong, H.T., Senapin, S., 2019. A validated semi-  
212 nested PCR for rapid detection of scale drop disease virus (SDDV) in Asian sea bass  
213 (*Lates calcarifer*). J Virol Methods. 268, 37-41.
- 214 Chen, J., Toh, X., Ong, J., Wang, Y., Teo, X. H., Lee, B., Wong, P. S., Khor, D., Chong, S.  
215 M., Chee, D., Wee, A., Wang, Y., Ng, M. K., Tan, B. H., Huangfu, T. (2019). Detection  
216 and characterization of a novel marine birnavirus isolated from Asian seabass in  
217 Singapore. Virology Journal, 16(1), 71.
- 218 Dangtip, S., Kampeera, J., Suvannakad, R., Khumwan, P., Jaroenram, W., Sonthi, M.,  
219 Senapin, S., Kiatpathomchai, W., 2019. Colorimetric detection of scale drop disease  
220 virus in Asian sea bass using loop-mediated isothermal amplification with xylenol  
221 orange. Aquaculture. 510, 386-391.
- 222 de Groof, A., Guelen, L., Deijs, M., Van Der Wal, Y., Miyata, M., Ng, K.S., Van Grinsven,  
223 L., Simmelink, B., Biermann, Y., Grisez, L., Van Lent, J., De Ronde, A., Chang, S.F.,  
224 Schrier, C., Van Der Hoek, L., 2015. A novel virus causes scale drop disease in *Lates*  
225 *calcarifer*. PLoS Pathog, 11, e1005074.
- 226 Dong, H. T., Taengphu, S., Sangsuriya, P., Charoensapsri, W., Phiwsaiya, K., Sornwatana,  
227 T., Khunrae, K., Rattanarojpong, T., Senapin, S. (2017a). Recovery of *Vibrio harveyi*  
228 from scale drop and muscle necrosis disease in farmed barramundi, *Lates calcarifer* in  
229 Vietnam. Aquaculture, 473, 89-96.
- 230 Dong, H.T., Jitrakorn, S., Kayansamruaj, P., Pirarat, N., Rodkhum, C., Rattanarojpong, T.,  
231 Senapin, S., Saksmerprome, V. (2017b). Infectious spleen and kidney necrosis

- 232 disease (ISKND) outbreaks in farmed barramundi (*Lates calcarifer*) in Vietnam. Fish  
233 Shellfish Immunol., 68, 65-73.
- 234 Gibson-Kueh, S., Chee, D., Chen, J., Wang, Y.H., Tay, S., Leong, L.N., Ng, M.L., Jones,  
235 J.B., Nicholls, P.K., Ferguson, H.W., 2012. The pathology of 'scale drop syndrome' in  
236 Asian seabass, *Lates calcarifer* Bloch, a first description. J. Fish Dis. 35, 19-27.
- 237 Hanson, L., Dishon, A., & Kotler, M. (2011). *Herpesviruses* that infect fish. Viruses, 3(11),  
238 2160-2191.
- 239 Jerry, D.R. (2014) Biology and Culture of Asian Seabass *Lates calcarifer*. CRC Press, Boca  
240 Raton, FL, USA.
- 241 Phiwsaiya, K., Charoensapsri, W., Taengphu, S., Dong, H.T., Sangsuriya, P., Nguyen,  
242 G.T.T., Pham, H.Q., Amparyup, P., Sritunyalucksana, K., Taengchaiyaphum, S.,  
243 Chaivisuthangkura, P., Longyant, S., Sithigomgul, P., Senapin, S. 2017. A natural  
244 *Vibrio parahaemolyticus*  $\Delta$ pirA<sup>VP</sup> pirB<sup>VP+</sup> mutant kills shrimp but produces neither  
245 Pir<sup>VP</sup> toxins nor acute hepatopancreatic necrosis disease lesions. Appl. Environ.  
246 Microbiol. 83(16): e00680-00617.
- 247 Ransangan, J., & Manin, B. O. (2010). Mass mortality of hatchery-produced larvae of Asian  
248 seabass, *Lates calcarifer* (Bloch), associated with viral nervous necrosis in Sabah,  
249 Malaysia. Vet Microbiol. 145, 153-157.
- 250 Senapin, S., Dong, H.T., Meemetta, W., Gangnonngiw, W., Sangsuriya, P., Vanichviriyakit,  
251 R., Sonthi, M., Nuangsaeng, B., 2019. Mortality from scale drop disease in farmed *Lates*  
252 *calcarifer* in Southeast Asia. J Fish Dis. 42, 119-127.
- 253 Sriisan, S., Boonchird, C., Thitamadee, S., Sonthi, M., Dong, H.T., Senapin, S. (2020) A  
254 sensitive and specific SYBR Green-based qPCR assay for detecting scale drop disease  
255 virus (SDDV) in Asian sea bass. Dis Aquat Organ. <https://doi.org/10.3354/dao03484>.

256 Toranzo, A. E., Magariños, B., & Romalde, J. L. (2005). A review of the main bacterial fish  
257 diseases in mariculture systems. *Aquaculture*, 246, 37-61.

258 **Tables and Figures**

259 **Table 1** LCHV loads in 8 different tissues from 5 barramundi samples in batch 1

| Sample | Fish clinical status | Cq and LCHV load*/200 ng template) |        |                 |                 |                 |                 |                 |                 |
|--------|----------------------|------------------------------------|--------|-----------------|-----------------|-----------------|-----------------|-----------------|-----------------|
|        |                      | Liver                              | Kidney | Spleen          | Gills           | Fin             | Brain           | Eyes            | Muscle          |
| 1      | “Scale drop”         | ND                                 | ND     | 33.33<br>[184]  | 35.91<br>[34.3] | 34.35<br>[94.7] | 34.4<br>[82.4]  | ND              | ND              |
| 2      | “Scale drop”         | ND                                 | ND     | 36.05<br>[31.3] | 32.39<br>[339]  | 34.26<br>[100]  | ND              | 35.07<br>[59.3] | 34.43<br>[89.9] |
| 3      | “Scale drop”         | ND                                 | ND     | ND              | ND              | 33.65<br>[149]  | 37.32<br>[13.7] | ND              | 36.46<br>[24.0] |
| 4      | “Scale drop”         | 36.02<br>[32]                      | ND     | 35.55<br>[43]   | 32.92<br>[240]  | 31.52<br>[597]  | 36.20<br>[28.4] | 34.81<br>[70.2] | 32.12<br>[404]  |
| 5      | Healthy              | ND                                 | ND     | ND              | ND              | ND              | ND              | ND              | ND              |

260 \*Cq values are the above number while the LCHV loads are shown in [ ]. Grey highlights

261 samples with LCHV load more than 90 copies. ND, not detected

262

263 **Table 2** LCHV detection test results of samples from batches 2 and 3

| <b>Batch no.</b> | <b>Sample no.</b> | <b>Fish clinical status</b> | <b>Tested tissue</b> | <b>Cq</b> | <b>LCHV loads/200 ng DNA template</b> |
|------------------|-------------------|-----------------------------|----------------------|-----------|---------------------------------------|
| 2<br>(fry)       | Pool 1            | Healthy                     | whole body           | ND        | Negative test                         |
|                  | Pool 2            | Healthy                     | whole body           | ND        | Negative test                         |
|                  | Pool 3            | Healthy                     | whole body           | ND        | Negative test                         |
|                  | Pool 4            | Healthy                     | whole body           | ND        | Negative test                         |
|                  | Pool 5            | Healthy                     | whole body           | ND        | Negative test                         |
| 3<br>(juvenile)  | Fish no. 1        | Healthy                     | spleen               | ND        | Negative test                         |
|                  | Fish no. 2        | Healthy                     | spleen               | ND        | Negative test                         |
|                  | Fish no. 3        | Healthy                     | spleen               | ND        | Negative test                         |
|                  | Fish no. 4        | Healthy                     | spleen               | ND        | Negative test                         |
|                  | Fish no. 5        | Healthy                     | spleen               | ND        | Negative test                         |
|                  | Fish no. 6        | “Scale drop”                | spleen               | 35.39     | 48.2                                  |
|                  | Fish no. 7        | “Scale drop”                | spleen               | 34.04     | 115.9                                 |
|                  | Fish no. 8        | “Scale drop”                | spleen               | 35.48     | 45.4                                  |
|                  | Fish no. 9        | “Scale drop”                | spleen               | 36.23     | 27.9                                  |
|                  | Fish no. 10       | “Scale drop”                | spleen               | 36.84     | 18.7                                  |

264 ND, not detected



265

266

267

268

269

270

271

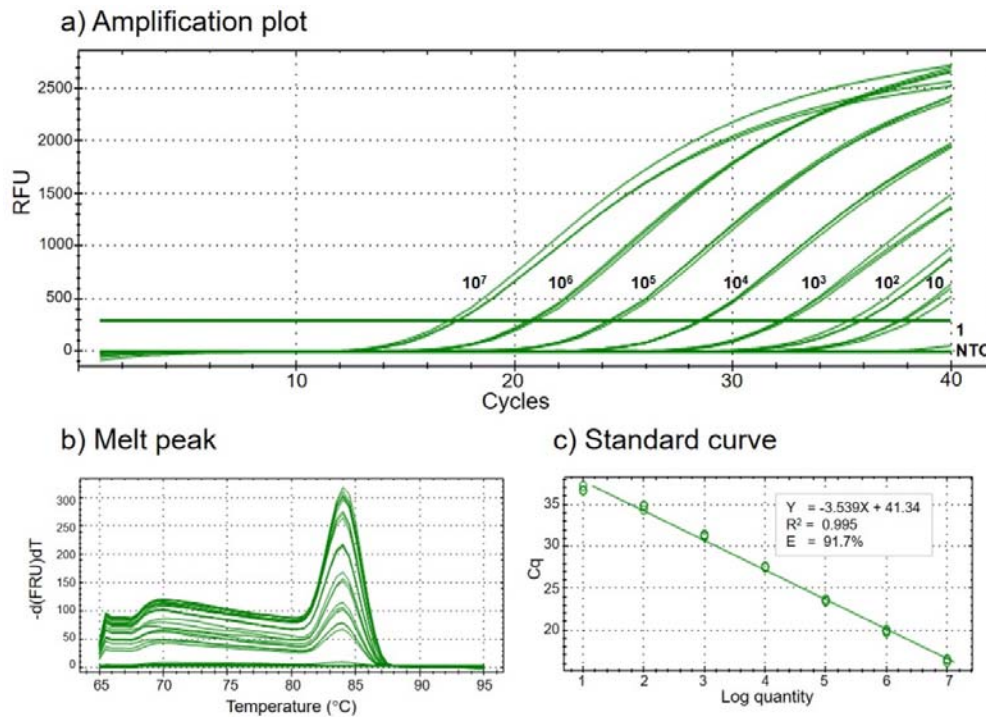

272

273

274

275

276

277 **Fig. 1** Performance and sensitivity of LCHV SBYR Green-based qPCR. (a) Amplification  
278 plots of positive control plasmid pMEP93 serial dilutions from 10<sup>7</sup> to 1 copies containing 100  
279 ng spiked fish DNA in each reaction. Three technical replicates were done for each dilution.  
280 (b) Melt peak analysis of the products obtained in (a). (c) Standard curve derived by plotting  
281 Cq values versus log<sub>10</sub> pMEP93 concentrations. Formula for copy number calculation, R<sup>2</sup> and  
282 E values are shown in the box.

283 a) List of samples used in specificity test

| Pathogens/samples               | Code    | Source                | Ave. Cq |
|---------------------------------|---------|-----------------------|---------|
| <i>Streptococcus iniae</i>      | VN2396  | Laboratory strain     | ND      |
| <i>Vibrio harveyi</i>           | SDMN-Y6 | Dong et al. 2017a     | ND      |
| <i>Vibrio parahaemolyticus</i>  | XN89    | Phiwsaiya et al. 2017 | ND      |
| <i>Vibrio tubiashi</i>          | SDMN-G4 | Dong et al. 2017a     | ND      |
| <i>Vibrio vulnificus</i>        | -       | Laboratory strain     | ND      |
| <i>Vibrio alginolyticus</i>     | -       | Laboratory strain     | ND      |
| <i>Vibrio cholera</i>           | NK8     | Dong et al. 2015      | ND      |
| <i>Pleisiomias shigelloides</i> | NK10    | Dong et al. 2015      | ND      |
| <i>Tenacibaculum litopenaei</i> | SDMN-T4 | Dong et al. 2017a     | ND      |
| <i>Nocardia seriolae</i>        | VN2391  | Laboratory strain     | ND      |
| <i>Aeromonas hydrophila</i>     | -       | Laboratory strain     | ND      |
| <i>Aeromonas dhakensis</i>      | -       | Laboratory strain     | ND      |
| ISKNV infected tissue           | -       | Dong et al. 2017b     | ND      |
| NNV infected tissue             | -       | Laboratory sample     | ND      |
| SDDV infected tissue            | -       | Senapin et al. 2019   | ND      |
| LCHV infected tissue            | -       | This study            | 30.35   |
| Healthy fish                    | -       | Laboratory sample     | ND      |
| No template control             | -       | -                     | ND      |

ND, not detected

290

b) Amplification plot

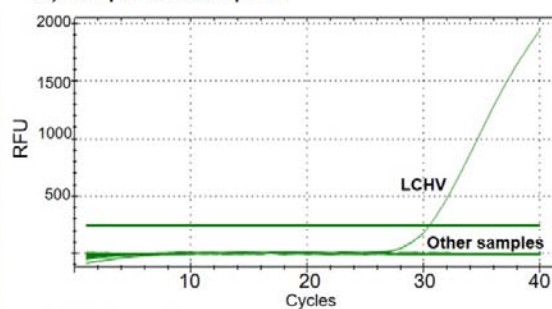

c) Melt peak

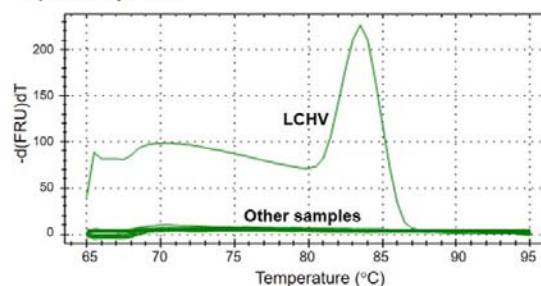

291 **Fig. 2** Specificity test of LCHV SBYR Green-based qPCR. (a) DNA samples extracted from  
 292 bacterial isolates and viral infected fish as well as control reactions (DNA from healthy fish  
 293 and no template control) were used in the specificity assay. Average Cq values from technical  
 294 replicates are shown. ND, not detected. (b) Amplification plots and (c) melt peak analysis of  
 295 products from samples shown in table (a).

296

297 gtacttcatcgctacggagcgctgggtcacctgtacatcataaccaccatgggcctcag  
 298 Y F I A Y G A L V T L Y I I T T M G L T  
 299 gacgtgacctggacctcctcaagcacacgta  
 300 D V T L D L L K H T

301

302 **Supplemental Fig. 1** Nucleotide sequence of the LCHV qPCR target. Putative translated  
 303 amino acid sequence is shown in capital alphabets. qPCR primers (double underlined) were  
 304 designed to generate a 93-bp fragment of LCHV *MEP* gene. Compared to previously  
 305 documented sequence (Chang et al. 2017), there is one silent mutation (gray highlighted)  
 306 found in this study.
